# Supplementary material for: A Low-Protein High-Fat Diet Leads to Loss of Body Weight and White Adipose Tissue Weight via Enhancing Energy Expenditure in Mice
Source: MDPI journal article supplement (doi:10.3390/metabo11050301), 2021-05-11
Supplement: s1 [file s1]

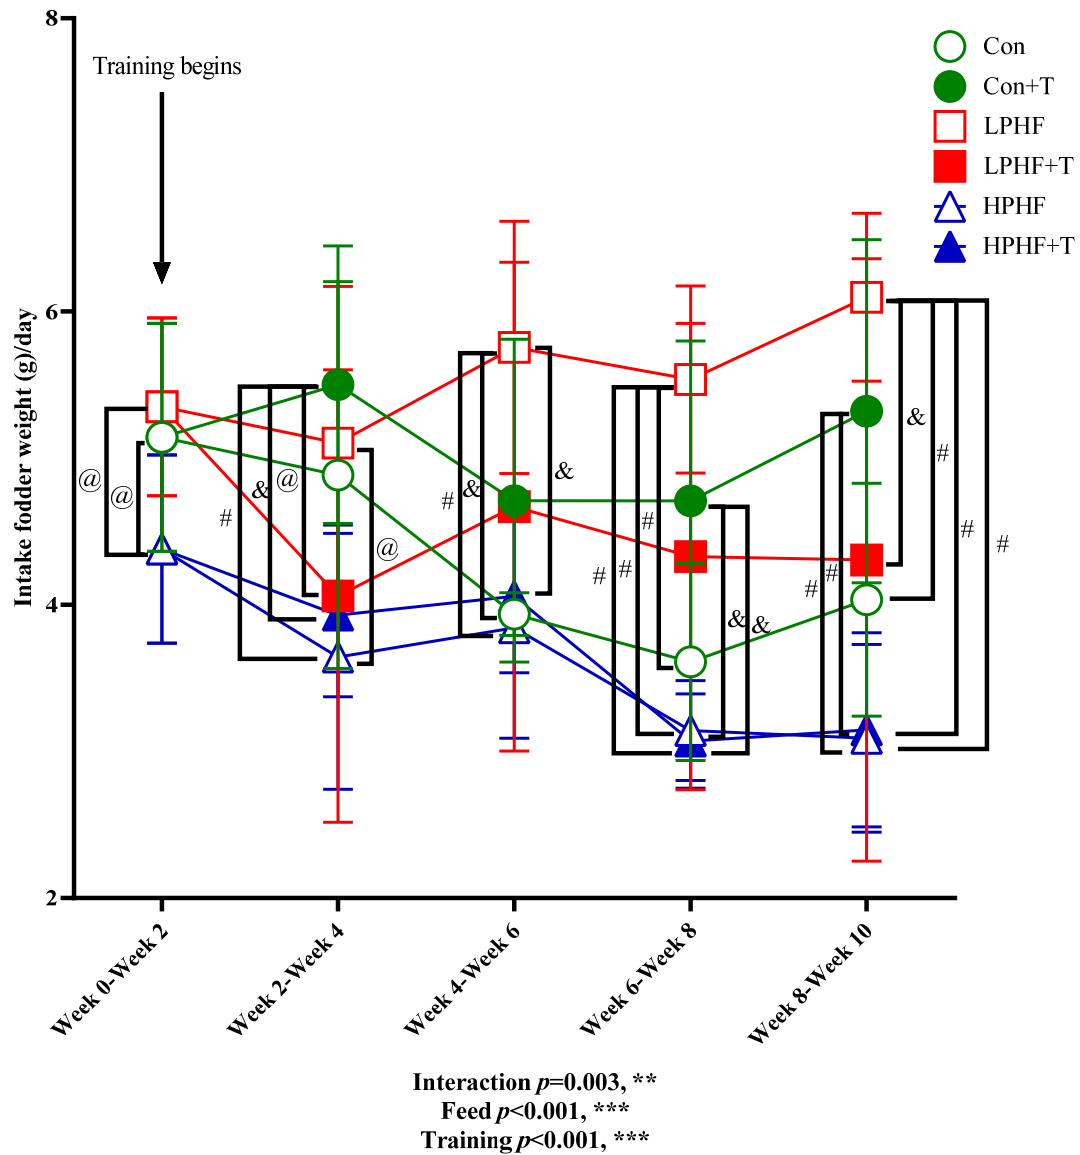

**Figure S1.** Changes of intake fodder weight throughout the experiment. Con, Con+T, LPHF, LPHF+T, HPHF, and HPHF+T represent chow diet, chow diet plus training, low-protein high-fat diet, low-protein high-fat diet plus training, high-protein high-fat diet, and high-protein high-fat diet plus training, respectively. Feed, training, and interaction indicate a dominant effect of diet, treadmill exercise, and the interactive effect between feed and training, respectively. \*\*  $p < 0.01$ ; \*\*\*  $p < 0.001$ . @,  $p < 0.05$ ; &,  $p < 0.01$ ; #,  $p < 0.001$ . Data are presented as the mean  $\pm$  SD.  $n = 8$  for each group. Significance of differences between means was determined by Tukey's post hoc test when ANOVA revealed a significant effect from interaction of diet and training.

**Table S1.** Effects of LPHF, HPHF and/or training on absolute tissues/organs weight.

| Tissue/Organ | Con groups               |                           | LPHF groups              |                           | HPHF groups                  |                            | Significance |      |             |
|--------------|--------------------------|---------------------------|--------------------------|---------------------------|------------------------------|----------------------------|--------------|------|-------------|
|              | Con                      | Con+T                     | LPHF                     | LPHF+T                    | HPHF                         | HPHF+T                     | Training     | Feed | Interaction |
| WAT, g       | 0.90 ± 0.31 <sup>e</sup> | 0.43 ± 0.18 <sup>ef</sup> | 0.53 ± 0.11 <sup>e</sup> | 0.45 ± 0.12 <sup>ef</sup> | 1.93 ± 0.72 <sup>abcdf</sup> | 1.01 ± 0.37 <sup>bde</sup> | ***          | ***  | **          |
| BAT, g       | 0.11 ± 0.03              | 0.10 ± 0.03               | 0.09 ± 0.02              | 0.20 ± 0.36               | 0.13 ± 0.05                  | 0.08 ± 0.03                | n.s.         | n.s. | n.s.        |
| SKM, g       | 0.18 ± 0.02              | 0.18 ± 0.01               | 0.14 ± 0.01              | 0.14 ± 0.01               | 0.18 ± 0.01                  | 0.18 ± 0.01                | n.s.         | ***  | n.s.        |
| Liver, g     | 1.11 ± 0.14              | 1.10 ± 0.09               | 0.98 ± 0.12              | 0.98 ± 0.06               | 1.30 ± 0.31                  | 1.20 ± 0.10                | n.s.         | ***  | n.s.        |
| Kidney, g    | 0.32 ± 0.03              | 0.33 ± 0.03               | 0.23 ± 0.02              | 0.24 ± 0.01               | 0.34 ± 0.04                  | 0.36 ± 0.02                | n.s.         | ***  | n.s.        |

WAT, BAT, and SKM represent white adipose tissue; brown adipose tissue; and skeletal muscle, respectively. Con, Con+T, LPHF, LPHF+T, HPHF, and HPHF+T represent chow diet, chow diet plus training, low-protein high-fat diet, low-protein high-fat diet plus training, high-protein high-fat diet, and high-protein high-fat diet plus training, respectively. Feed, training, and interaction indicate a dominant effect of diet, treadmill exercise, and the interactive effect between feed and training, respectively. n.s., no significance was observed. \*\*  $p < 0.01$  and \*\*\*  $p < 0.001$ . Data are presented as the mean ± SD. n = 8 for each group. Significance of differences between means was determined by Tukey's post hoc test when ANOVA revealed a significant effect from interaction of diet and training. <sup>a-f</sup>, significantly different from Con, Con+T, LPHF, LPHF+T, HPHF, and HPHF+T, respectively.
